# Supplementary material for: Regional and sectoral contributions of NO x and reactive carbon emission sources to global trends in tropospheric ozone during the 2000–2018 period
Source: Copernicus journal article supplement (doi:10.5194/acp-25-5287-2025), 2025-05-26
Supplement: Supplementary file 1 [file acp-25-5287-2025-supplement.zip]

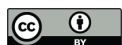

## *Supplement of*

# **Regional and sectoral contributions of $\text{NO}_x$ and reactive carbon emission sources to global trends in tropospheric ozone during the 2000–2018 period**

**Aditya Nalam et al.**

*Correspondence to:* Aditya Nalam (adinalam@zedat.fu-berlin.de)

- acp-25-5287-2025-supplement-title-page.pdf
- Supplementary materials
  - Readme.docx
  - Supplementary\_figures-tables-renewed.docx
  - noxtagged\_annual\_renewed.csv
  - rctagged\_annual\_renewed.csv

The copyright of individual parts of the supplement might differ from the article licence.
