# Supplementary material for: Regional and sectoral contributions of NO x and reactive carbon emission sources to global trends in tropospheric ozone during the 2000–2018 period
Source: Copernicus journal article supplement (doi:10.5194/acp-25-5287-2025), 2025-05-26
Supplement: Supplementary file 2 [file Readme.docx]

*Supplement for*

Regional and sectoral contributions of NOx and reactive carbon emission sources to global trends in tropospheric ozone during the 2000-2018 period

Aditya Nalam et al.,

*Correspondence to*: Aditya Nalam (adinalam@zedat.fu-berlin.de)

**Contents**

This document contains the supplementary figures and tables referred to in the main text (Supplementary-figures-tables-renewed.docx), and the data plotted in the time-series figures: 3,5,6,7, and 8 (noxtagged_annual-renewed.csv for NOx-tagged and rctagged_annual-renewed.csv for RC-tagged results).

**Abbreviations used in the data files.**

| **Column Titles (All are annual means only)** | |
| --- | --- |
| **Emis** | **Precursor Emissions**  **(TgN/yr for NOx-tagged; TgC/yr for RC-tagged)** |
| **Burd** | **Tropospheric Ozone Burden (Tg)** |
| **OPE** | **Ozone Production Efficiency**  **(mol O3/mol N for NOx-tagged; mol O3/mol C for RC-tagged)** |
| **Srfm** | **Surface mean (ppbv)** |
| **Popw** | **Population Weighted mean (ppbv)** |
| **Tags** | |
| **AIR** | **Aircraft** |
| **STR** | **Stratospheric** |
| **TOT** | **Total** |
| **LGT** | **Lightning** |
| **CH4** | **Methane** |
| **BIO** | **Biogenic** |
| **BMB** | **Biomass Burning** |
| **EAS** | **East Asia** |
| **EUR** | **Europe** |
| **NAM** | **North America** |
| **SAS** | **South Asia** |
| **RBU** | **Russia-Belarus-Ukraine** |
| **MDE** | **Middle East** |
| **SHP** | **Shipping** |
| **ROW** | **Rest of the World (As defined in Table 1)** |
| **ANT** | **Total Surface Anthropogenic** |
